# Supplementary material for: Developing an initial set of quality indicators for chiropractic care: a scoping review
Source: Springer Nature journal article supplement (doi:10.1186/s12913-024-10561-8), 2024-01-12
Supplement: MOESM3 [file 26622192]

## Quality indicator 2<sup>nd</sup> level review checklist

*\*Note: For all No and Unclear responses, document reasons/questions in the reviewer notes field in the corresponding spreadsheet*

1. Identify source document.
2. Title: Does the title match the description?  Y  N  Unclear
3. Is condition category consistent with source document?  Y  N  Unclear  
*\*Note: Some abstracted indicators were genericized because they are applicable to multiple problems, such as the need for an exam regardless of problem (e.g., headache, neck pain, etc.)*
4. Is the Donabedian category appropriate?  Y  N  Unclear
5. Is the IOM domain appropriate?  Y  N  Unclear
6. Is the evidence level appropriate?  Y  N  Unclear  
*\*Note: when references supporting an abstracted indicator are not listed in the source document, the default grading is 5. When references are available, review to determine grading level*
7. Is the metric understandable?  Y  N  Unclear
8. Does the metric appear to measure the intended indicator?  Y  N  Unclear  
*\*Note: The metric should measure what is described in the title and description*
9. Does the indicator meet all 5 SMART criteria?  Y  N  Unclear
10. Is the indicator distinct from others from the same source?  Y  N  Unclear
